# Supplementary material for: Cocaine Detection by a Laser-induced Immunofluorometric Biosensor
Source: Preprints.org preprint supplement (doi:10.20944/preprints202107.0521.v1), 2021-07-22
Supplement: Supplementary file 2 [file supplementary]

Archive with 16 entries (16 files):
- Capture_01.fits
- Capture_02.fits
- Capture_03.fits
- Capture_04.fits
- Capture_05.fits
- Capture_06.fits
- Capture_07.fits
- Capture_08.fits
- Capture_09.fits
- Capture_10.fits
- Capture_11.fits
- evaluator.py
- hotpixels_1920_1200.txt
- Paul-2021-Biosensors Supplement cocaine 2021-07-21a.pdf
- results.txt
- roi_region_x_y.txt
