# Supplementary material for: Cocaine Detection by a Laser-induced Immunofluorometric Biosensor
Source: Preprints.org preprint supplement (doi:10.20944/preprints202107.0521.v1), 2021-07-22
Supplement: Supplementary file 2 [file supplementary › hotpixels_1920_1200.txt]

1918	1198
1917	1197
1916	1196
996	8
643	11
139	13
1783	15
59	17
1809	19
1188	21
1903	21
1199	23
54	26
1132	28
1787	29
1082	36
259	38
1123	44
1262	45
500	46
1824	49
126	50
1460	50
280	51
209	55
259	55
1600	58
1611	58
1061	62
172	63
963	64
567	67
1646	67
1084	68
728	69
1508	71
911	73
1234	73
1879	74
817	79
876	79
1462	83
751	85
475	86
792	87
1294	89
523	95
22	101
641	101
1798	105
689	106
1522	110
217	111
1918	111
90	114
941	116
595	119
443	120
1113	120
158	127
265	132
589	136
1246	137
1678	138
263	142
1137	143
1821	147
983	148
356	155
1680	157
591	165
143	166
276	166
1044	170
590	171
264	172
848	173
1848	174
746	177
1880	177
433	180
615	181
1556	181
1708	187
1897	187
788	188
1558	193
1655	194
1774	195
1032	200
494	202
1292	208
1600	209
1379	211
1421	211
261	213
1853	215
451	222
1025	224
1034	225
751	230
295	233
481	234
713	238
614	241
1457	242
322	245
491	249
414	259
401	260
353	272
677	273
150	278
1276	282
1420	284
517	287
1529	287
1046	299
923	302
86	311
101	311
1005	311
455	314
77	318
956	319
1473	325
1403	326
870	329
1117	335
128	339
1550	339
488	342
517	342
735	342
1471	342
1103	346
1329	346
175	351
907	352
788	354
1212	354
1720	359
1502	360
752	365
1104	365
1477	365
346	368
1636	371
966	372
990	372
905	375
644	377
1637	377
1591	379
413	380
1169	380
1415	380
1703	383
1069	386
1860	391
1729	393
737	395
1652	398
1802	401
1004	405
1561	405
493	407
899	407
1917	407
1052	414
1764	418
1864	418
1138	424
1762	424
748	426
1478	429
954	431
1735	437
423	439
513	444
573	446
1916	455
337	462
1504	462
1063	463
173	467
245	469
1045	470
517	474
233	476
1794	488
1919	495
378	498
1370	501
90	502
1160	511
6	516
1613	516
1224	528
245	530
1661	531
102	532
267	532
498	533
969	534
314	535
1884	540
736	543
1707	547
801	550
1272	550
1574	552
575	554
132	555
1176	557
68	558
78	558
648	563
1077	566
635	568
1297	571
883	572
1070	582
67	583
608	583
433	585
1452	585
841	589
1887	589
844	590
999	595
950	600
1058	611
1787	611
1890	616
1878	617
1246	620
516	621
1468	623
1673	626
1307	627
746	628
1493	634
927	639
1580	640
352	642
1064	646
1124	646
1287	646
537	649
1914	651
47	652
1034	662
125	664
433	665
1693	665
524	668
717	668
442	669
147	675
1823	677
1706	679
1673	682
505	683
1485	684
1848	689
770	690
159	695
569	699
1402	701
1787	703
311	704
680	704
1236	713
537	714
108	717
1773	717
1040	719
5	723
1833	723
1424	724
862	725
130	729
1043	730
658	732
1242	733
1695	736
620	739
1130	741
187	746
1301	750
1354	754
845	756
1107	756
1694	756
387	766
1366	766
1600	769
1036	773
1818	781
491	782
870	782
503	785
1258	785
430	787
1534	787
191	791
1765	792
375	793
841	794
221	799
752	801
1821	802
697	803
1134	805
1821	806
1562	809
446	811
1239	813
1065	814
1069	817
1581	821
932	822
1563	833
1224	837
561	847
243	850
779	853
304	856
468	856
11	857
1839	858
563	864
382	869
1012	870
278	876
1464	881
1587	887
1058	895
903	900
1080	906
1607	908
505	909
1679	909
336	920
1636	920
1089	921
1524	921
359	928
1568	932
32	934
641	935
1069	937
1756	937
332	941
783	942
1502	955
1251	958
1785	961
1885	968
1560	970
245	974
1797	977
1850	978
1896	978
908	981
1699	982
351	984
629	986
973	988
840	989
955	989
1749	989
1467	993
1600	997
956	1000
1472	1000
1515	1004
579	1008
1612	1008
1287	1012
1187	1013
1722	1014
1442	1022
1248	1037
379	1042
65	1044
1730	1049
15	1050
366	1050
1020	1051
12	1052
83	1066
1580	1070
455	1072
1679	1072
1673	1075
1621	1077
296	1078
1439	1084
512	1086
107	1089
1134	1095
968	1096
1193	1097
875	1099
103	1106
198	1110
1597	1111
1095	1114
1589	1114
707	1115
641	1116
441	1119
1172	1119
823	1120
654	1125
38	1126
904	1126
569	1127
953	1132
1584	1134
725	1136
125	1137
908	1137
935	1139
1638	1141
595	1150
836	1150
326	1154
1382	1154
579	1161
1025	1163
859	1165
444	1167
1615	1167
812	1168
669	1170
1516	1170
1482	1173
1369	1180
1245	1182
785	1184
367	1189
995	1189
265	1194
1111	1198
967	1199
