# Supplementary material for: Cocaine Detection by a Laser-induced Immunofluorometric Biosensor
Source: Preprints.org preprint supplement (doi:10.20944/preprints202107.0521.v1), 2021-07-22
Supplement: Supplementary file 2 [file supplementary › results.txt]

source directory of the raw data: 

     C:\Users\mpaul\Desktop\paper_cocaine\python\cocaine_paper\cocaine_paper\


fit guess: 

     x0_guess = 1010
     y0_guess = 685
     x_alpha guess = 4
     y_alpha guess = 4
     A guess = 1000
     offset_guess = 0


Evaluation specific data: 

     halfwidth of the ROI square in pixels    = 4
     ROI square in pixels (number)   = 64
     roi_region (x) :843-893
     roi_region (Y) :812-862
     lower border pixel :8
     higher border pixel :3

Columns: 
     1: frame number 
     2: median intensity of the ROI
     3: x0 center of the roi 
     4: y0_center of the roi

0.0	 3.834e+03	 1.000e+00	 1.000e+00
1.0	 3.843e+03	 1.000e+00	 1.000e+00
2.0	 3.846e+03	 1.000e+00	 1.000e+00
3.0	 4.006e+03	 1.000e+00	 1.000e+00
4.0	 4.083e+03	 1.000e+00	 1.000e+00
5.0	 4.422e+03	 1.000e+00	 1.000e+00
6.0	 4.877e+03	 1.000e+00	 1.000e+00
7.0	 5.229e+03	 1.000e+00	 1.000e+00
8.0	 5.658e+03	 1.000e+00	 1.000e+00
9.0	 5.856e+03	 1.000e+00	 1.000e+00
10.0	 6.070e+03	 1.000e+00	 1.000e+00
